# Supplementary material for: Mapping soybean rhg2 locus, which confers resistance to soybean cyst nematode race 1 in combination with rhg1 and Rhg4 derived from PI 84751
Source: PubMed Central journal article supplement — Breed Sci. 2020 Aug 6;70(4):474–80. doi: 10.1270/jsbbs.20035 (PMC7495202; doi:10.1270/jsbbs.20035), 2020-08-06
Supplement: 70_474_s2.pdf [file 70_474_s2.pdf]

Supplemental Table 1. Genotypes of QTL detected using 199 RILs and phenotype of RILs('Tokei 758'/'To-8E')

| QTL detected using 199 RILs |                              |                     | Number of RILs <sup>c</sup> | Percent number of cysts <sup>d</sup> |        |          | t-test<br><i>P</i> <sup>d</sup> | Reported resistant gene /QTL in the location |
|-----------------------------|------------------------------|---------------------|-----------------------------|--------------------------------------|--------|----------|---------------------------------|----------------------------------------------|
| Chromosome                  | Marker interval <sup>a</sup> | Allele <sup>b</sup> |                             | Average                              | SD     |          |                                 |                                              |
| 4                           | Satt607 - <u>AW277661</u>    | <u>To-8E</u>        | 91                          | 44.5                                 | ± 12.4 | ns       |                                 |                                              |
|                             |                              | Tokei 758           | 107                         | 45.4                                 | ± 10.3 |          |                                 |                                              |
| 18                          | <u>Sat_210</u> - Satt235     | <u>To-8E</u>        | 58                          | 36.7                                 | ± 13.0 | 2.91E-12 | <i>rhg1</i>                     |                                              |
|                             |                              | Tokei 758           | 140                         | 48.5                                 | ± 5.2  |          |                                 |                                              |
| 18                          | Satt199 - <u>Satt288</u>     | To-8E               | 93                          | 45.7                                 | ± 12.4 | ns       |                                 |                                              |
|                             |                              | <u>Tokei 758</u>    | 106                         | 44.3                                 | ± 10.3 |          |                                 |                                              |

<sup>a</sup> Nearest marker is underlined

<sup>b</sup> Resistant allele is underlined.

<sup>c</sup> RILs were grouped according to genotype of the nearest marker in each QTL region.

<sup>d</sup> Percent number of cysts to that of susceptible control variety, 'Suzumaru'.

Supplemental Table 2. Segregation distortion in RILs('Tokei 758'/'To-8E')

| Total number<br>of RILs | Observed number of RILs |             |        | Expected rate of<br>resistant RILs     |
|-------------------------|-------------------------|-------------|--------|----------------------------------------|
|                         | Resistant               | Susceptible |        |                                        |
| 199                     | 8                       | 198         | 2 loci | $1/2 \times 1/2$                       |
|                         |                         |             | 3 loci | $1/2 \times 1/2 \times 1/2$            |
|                         |                         |             | 4 loci | $1/2 \times 1/2 \times 1/2 \times 1/2$ |

| Expected segregation rate | Expected value |             | P-value  |     |
|---------------------------|----------------|-------------|----------|-----|
|                           | Resistant      | Susceptible |          |     |
| 1:3                       | 49.8           | 149.3       | 9.43E-13 | *** |
| 1:7                       | 24.9           | 174.1       | 1.25E-04 | *** |
| 1:15                      | 12.4           | 186.6       | 0.131    | ns  |
