# Supplementary figures and images for: Mapping soybean rhg2 locus, which confers resistance to soybean cyst nematode race 1 in combination with rhg1 and Rhg4 derived from PI 84751
Source: PubMed Central journal article supplement — Breed Sci. 2020 Aug 6;70(4):474–80. doi: 10.1270/jsbbs.20035 (PMC7495202; doi:10.1270/jsbbs.20035), 2020-08-06

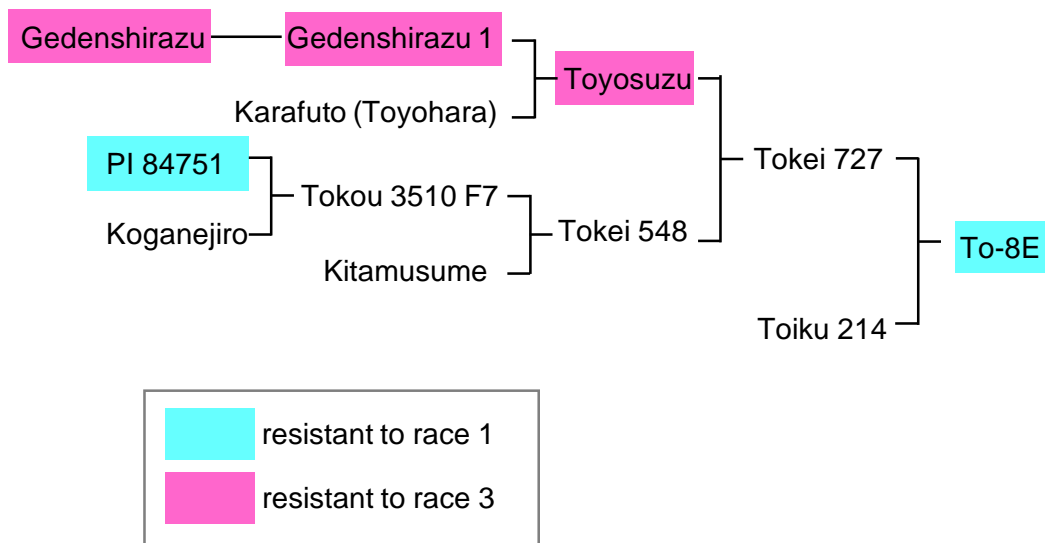

**Supplemental Fig. 1.** Pedigree of 'To-8E', the resistant parent of RILs.

Supplement: 70_474_s1.pdf [file 70_474_s1.pdf]
